# Supplementary material for: Facile synthesis of porous NiCo2O4 nanoflakes as magnetic recoverable catalysts towards the efficient degradation of RhB
Source: Royal Society of Chemistry journal article supplement (doi:10.1039/c6ra12706a), 2016-01-01
Supplement: c6ra12706a1.pdf [file c6ra12706a1.pdf]

**Electronic Supplementary information:**

**Facile Synthesis of Porous NiCo<sub>2</sub>O<sub>4</sub> Nanoflake as Magnetic Recoverable  
Catalysts towards Efficient Degradation of RhB**

Wenwen Zhang, Yi Su, Xuemei Zhang, Ying Yang, Xiaohui Guo\*

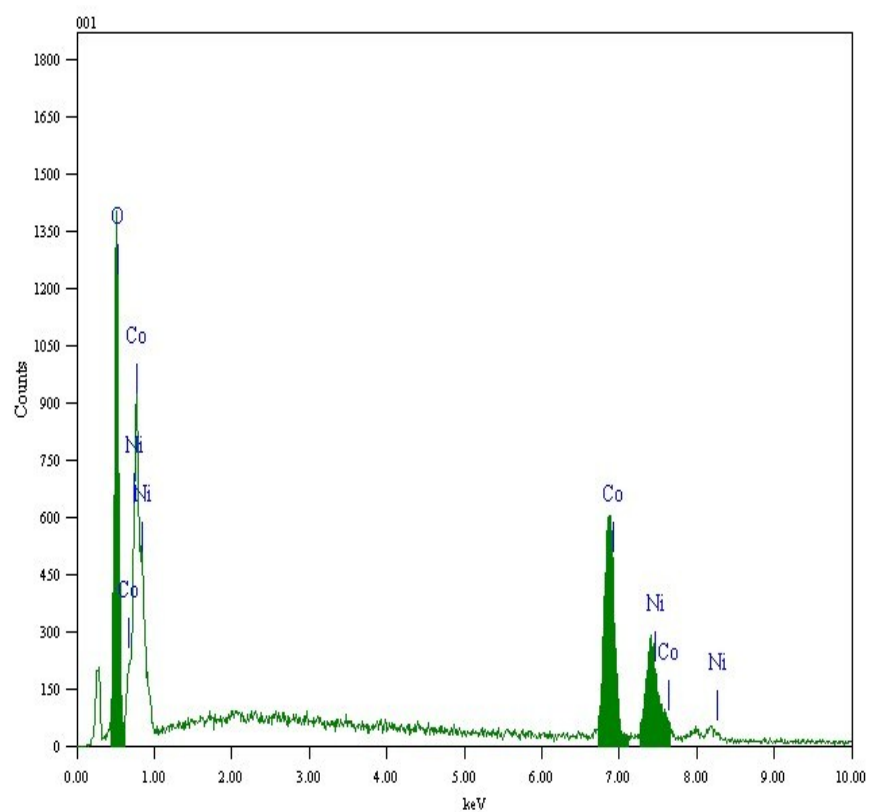

**Figure S1:** EDS pattern of the prepared flake-like  $\text{NiCo}_2\text{O}_4$  sample in the case of DMF/DIW mixed solvents system.

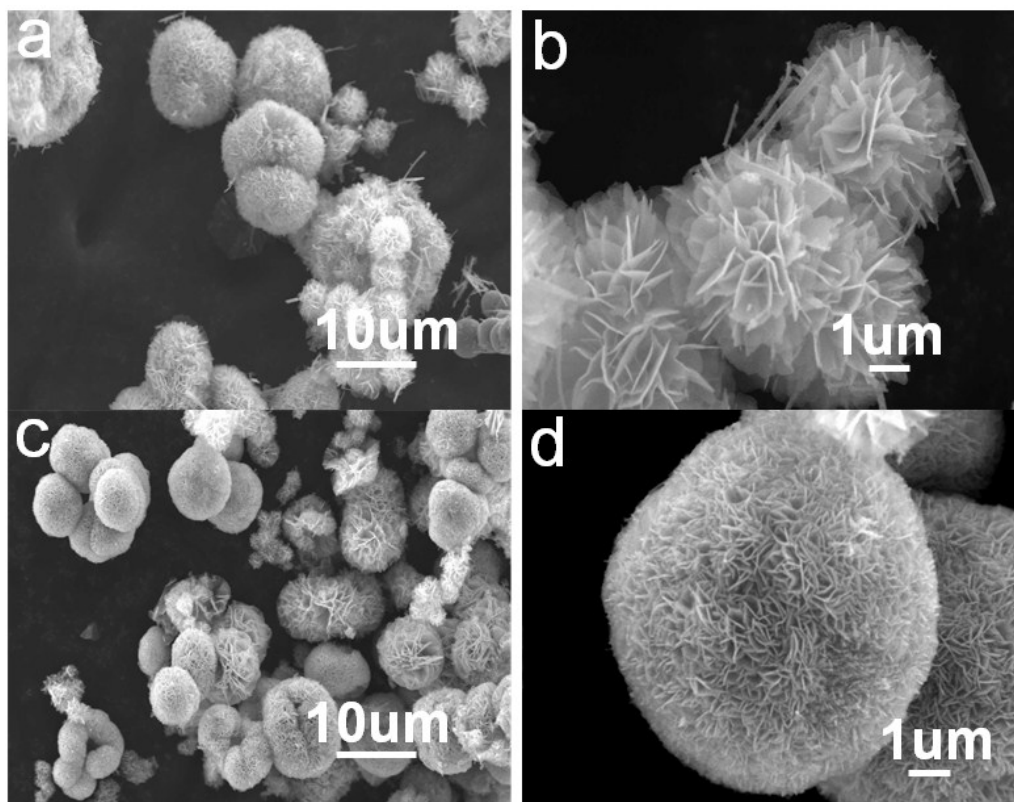

**Figure S2:** SEM images of the prepared  $\text{NiCo}_2\text{O}_4$  samples at different mixed solvent systems, (a, b) Methanol/DIW; (c, d) Ethanol/DIW.

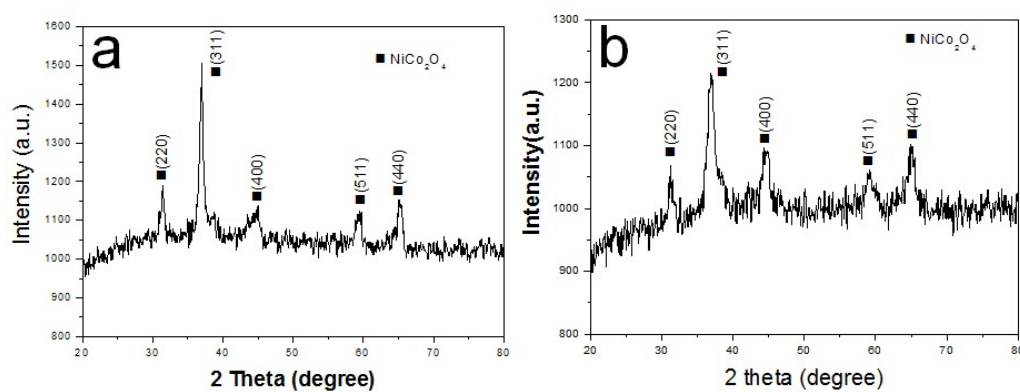

**Figure S3:** XRD patterns of the prepared  $\text{NiCo}_2\text{O}_4$  samples at different mixed solvent systems, (a) Methanol/DIW; (b) Ethanol/DIW.

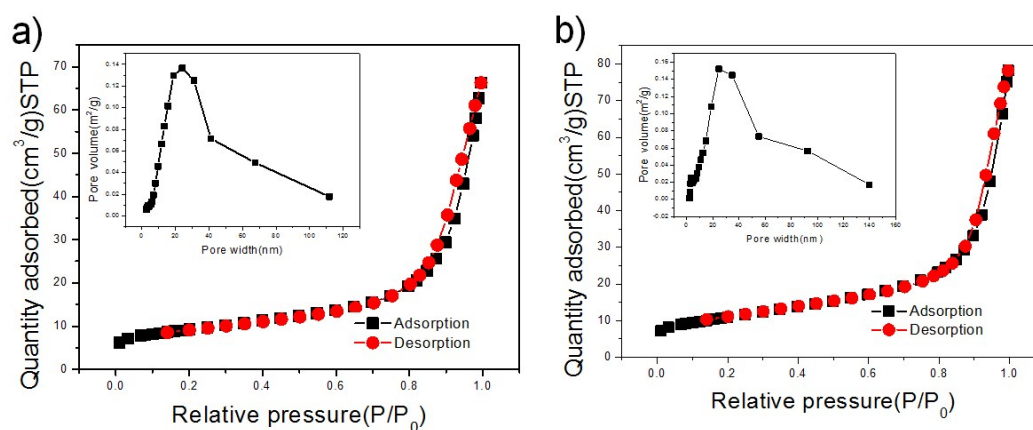

**Figure S4:** Isothermal  $N_2$  absorption/desorption testing of the prepared  $\text{NiCo}_2\text{O}_4$  samples at different mixed solvent systems, (a) Methanol/DIW; (b) Ethanol/DIW

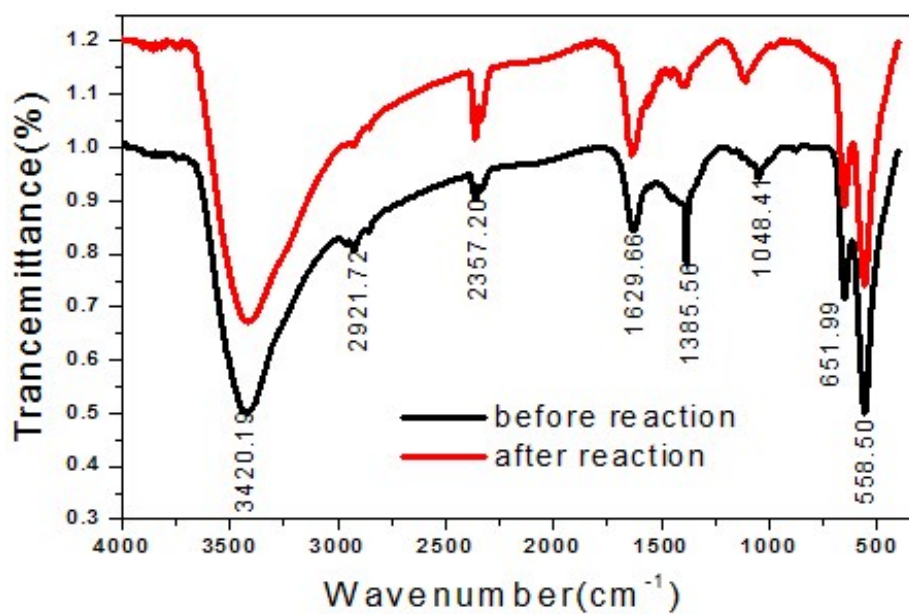

**Figure S5:** FTIR of the prepared flake-like  $\text{NiCo}_2\text{O}_4$  sample before and after catalytic reaction.
